# Supplementary material
Source: PubMed Central journal article supplement (PMC1955278)
Supplement: hesr0042-1564-ts1.pdf [file hesr0042-1564-ts1.pdf]

**Appendix Table A1. Estimated Regression Coefficients (Upper, lower 95% confidence interval limits) in the Equations for Insurance Coverage Before Pregnancy and Whether the Woman Began Prenatal Care in Her First Trimester**

|                                                                      | Health Insurance Coverage before Pregnancy |                            | First-trimester Prenatal Care Initiation |                           |                                |                                          |
|----------------------------------------------------------------------|--------------------------------------------|----------------------------|------------------------------------------|---------------------------|--------------------------------|------------------------------------------|
|                                                                      | Medicaid                                   | Private Insurance          | Ordinary Least Squares                   | Two-Stage Least Squares   | Single Equation Logistic Model | Two-Equation Model with Terza Adjustment |
| Insurance status before pregnancy (Uninsured omitted)                |                                            |                            |                                          |                           |                                |                                          |
| Medicaid coverage                                                    | ---                                        | ---                        | 0.102***<br>(0.070, 0.135)               | ---                       | 0.541***<br>(0.383, 0.699)     | 0.836*<br>(-0.071, 1.744)                |
| Predicted Medicaid coverage                                          | ---                                        | ---                        | ---                                      | 0.276<br>(-0.463, 1.015)  | ---                            | ---                                      |
| Predicted residuals, Medicaid coverage equation                      | ---                                        | ---                        | ---                                      | ---                       | ---                            | -0.317<br>(-1.240, 0.607)                |
| Private insurance coverage                                           | ---                                        | ---                        | 0.129***<br>(0.107, 0.152)               | ---                       | 0.739***<br>(0.616, 0.862)     | -0.484<br>(-1.522, 0.554)                |
| Predicted private insurance coverage                                 | ---                                        | ---                        | ---                                      | 0.149<br>(-0.433, 0.731)  | ---                            | ---                                      |
| Predicted residuals, Private insurance coverage equation             | ---                                        | ---                        | ---                                      | ---                       | ---                            | 1.222**<br>(0.181, 2.263)                |
| Medicaid eligibility category (Expansion-related eligible omitted)   |                                            |                            |                                          |                           |                                |                                          |
| Welfare-related eligible                                             | 0.806***<br>(0.418, 1.194)                 | 0.052<br>(-0.392, 0.496)   | -0.016<br>(-0.085, 0.053)                | -0.066<br>(-0.282, 0.150) | 0.043<br>(-0.275, 0.361)       | -0.134<br>(-0.514, 0.245)                |
| Not eligible                                                         | -0.705***<br>(-1.181, -0.230)              | 1.421***<br>(1.200, 1.642) | 0.050***<br>(0.019, 0.080)               | 0.058<br>(-0.088, 0.205)  | 0.400***<br>(0.181, 0.619)     | 0.758***<br>(0.422, 1.094)               |
| Post-welfare reform (Pre-welfare reform omitted)                     | 0.460<br>(-0.150, 1.070)                   | -0.078<br>(-0.378, 0.222)  | 0.051**<br>(0.012, 0.090)                | 0.053**<br>(0.010, 0.097) | 0.301**<br>(0.063, 0.540)      | 0.355***<br>(0.116, 0.594)               |
| Interaction terms (Post-welfare reform × expansion eligible omitted) |                                            |                            |                                          |                           |                                |                                          |
| Post-welfare reform × Welfare-related eligible                       | -0.998***<br>(-1.610, -0.385)              | -0.048<br>(-0.569, 0.473)  | -0.005<br>(-0.083, 0.074)                | 0.020<br>(-0.108, 0.148)  | -0.022<br>(-0.380, 0.335)      | 0.043<br>(-0.330, 0.417)                 |

|                                                    | Health Insurance Coverage<br>before Pregnancy |                               | First-trimester Prenatal Care Initiation |                               |                                   |                                                |
|----------------------------------------------------|-----------------------------------------------|-------------------------------|------------------------------------------|-------------------------------|-----------------------------------|------------------------------------------------|
|                                                    | Medicaid                                      | Private<br>Insurance          | Ordinary Least<br>Squares                | Two-Stage<br>Least Squares    | Single Equation<br>Logistic Model | Two-Equation<br>Model with Terza<br>Adjustment |
| Post-welfare reform ×<br>Not eligible              | -0.391<br>(-0.931, 0.148)                     | 0.112<br>(-0.141, 0.365)      | -0.033**<br>(-0.065, -0.000)             | -0.039**<br>(-0.077, -0.002)  | -0.207*<br>(-0.445, 0.031)        | -0.248**<br>(-0.487, -0.009)                   |
| Mother's age<br>(25 to 34 years omitted)           |                                               |                               |                                          |                               |                                   |                                                |
| Under 17 years                                     | 1.534***<br>(1.164, 1.905)                    | 0.932***<br>(0.606, 1.258)    | -0.163***<br>(-0.222, -0.104)            | -0.190***<br>(-0.325, -0.056) | -0.755***<br>(-1.032, -0.477)     | -0.691***<br>(-1.027, -0.355)                  |
| 17 to 24 years                                     | 0.215**<br>(0.032, 0.398)                     | -0.361***<br>(-0.493, -0.229) | -0.024**<br>(0.044, -0.003)              | -0.028<br>(-0.072, 0.016)     | -0.173***<br>(-0.299, -0.046)     | -0.274***<br>(-0.416, -0.131)                  |
| 35 or more years                                   | -0.505***<br>(-0.865, -0.145)                 | 0.077<br>(-0.109, 0.264)      | -0.013<br>(-0.034, 0.008)                | -0.011<br>(-0.038, 0.016)     | -0.127<br>(-0.300, 0.047)         | -0.090<br>(-0.266, 0.086)                      |
| Mother's race<br>(Non-Hispanic white omitted)      |                                               |                               |                                          |                               |                                   |                                                |
| Non-Hispanic black                                 | 0.925***<br>(0.701, 1.148)                    | 0.277***<br>(0.114, 0.440)    | -0.052***<br>(-0.077, -0.027)            | -0.066**<br>(-0.131, -0.001)  | -0.335***<br>(-0.480, -0.191)     | -0.351***<br>(-0.517, -0.185)                  |
| Hispanic                                           | -0.207<br>(-0.480, 0.066)                     | -0.887***<br>(-1.072, -0.703) | -0.028*<br>(-0.056, 0.001)               | -0.023<br>(-0.105, 0.058)     | -0.225***<br>(-0.393, -0.058)     | -0.394***<br>(-0.613, -0.175)                  |
| Asian or Pacific Islander                          | -0.087<br>(-0.612, 0.439)                     | -0.348**<br>(-0.680, -0.016)  | -0.125***<br>(-0.173, -0.076)            | -0.122***<br>(-0.176, -0.069) | -0.868***<br>(-1.147, -0.589)     | -0.924***<br>(-1.207, -0.641)                  |
| Native American or Alaska<br>native                | 0.005<br>(-0.343, 0.353)                      | -0.492***<br>(-0.745, -0.239) | -0.015<br>(-0.059, 0.030)                | -0.015<br>(-0.081, 0.051)     | -0.072<br>(-0.310, 0.166)         | -0.179<br>(-0.432, 0.075)                      |
| Other or unknown                                   | -0.326<br>(-1.500, 0.847)                     | -0.102<br>(-0.715, 0.510)     | -0.047<br>(-0.130, 0.036)                | -0.033<br>(-0.115, 0.048)     | -0.390<br>(-0.937, 0.157)         | -0.368<br>(-0.916, 0.181)                      |
| Mother's education<br>(Some college omitted)       |                                               |                               |                                          |                               |                                   |                                                |
| Less than high school                              | 0.528***<br>(0.271, 0.785)                    | -0.848***<br>(-1.034, -0.662) | -0.100***<br>(-0.130, -0.070)            | -0.110**<br>(-0.216, -0.004)  | -0.546***<br>(-0.714, -0.379)     | -0.783***<br>(-1.012, -0.554)                  |
| High school graduate only                          | 0.279**<br>(0.045, 0.513)                     | -0.371***<br>(-0.510, -0.233) | -0.029***<br>(-0.047, -0.010)            | -0.031<br>(-0.071, 0.009)     | -0.239***<br>(-0.375, -0.103)     | -0.335***<br>(-0.485, -0.185)                  |
| Unknown                                            | 0.251<br>(-0.219, 0.721)                      | -0.248*<br>(-0.535, 0.040)    | -0.010<br>(-0.059, 0.038)                | -0.007<br>(-0.057, 0.044)     | -0.166<br>(-0.466, 0.134)         | -0.213<br>(-0.513, 0.087)                      |
| Mother was married<br>(Mother not married omitted) | -0.338***<br>(-0.576, -0.101)                 | 0.561***<br>(0.406, 0.715)    | 0.035***<br>(0.010, 0.061)               | 0.037<br>(-0.029, 0.103)      | 0.244***<br>(0.101, 0.386)        | 0.387***<br>(0.212, 0.562)                     |
| State                                              |                                               |                               |                                          |                               |                                   |                                                |

|                                                                                                            | Health Insurance Coverage<br>before Pregnancy |                            | First-trimester Prenatal Care Initiation |                            |                                   |                                                |
|------------------------------------------------------------------------------------------------------------|-----------------------------------------------|----------------------------|------------------------------------------|----------------------------|-----------------------------------|------------------------------------------------|
|                                                                                                            | Medicaid                                      | Private<br>Insurance       | Ordinary Least<br>Squares                | Two-Stage<br>Least Squares | Single Equation<br>Logistic Model | Two-Equation<br>Model with Terza<br>Adjustment |
| (Alaska omitted)                                                                                           |                                               |                            |                                          |                            |                                   |                                                |
| Florida                                                                                                    | -0.549***<br>(-0.954, -0.144)                 | 0.315**<br>(0.032, 0.597)  | 0.034**<br>(0.007, 0.062)                | 0.039**<br>(0.004, 0.073)  | 0.260***<br>(0.080, 0.441)        | 0.312***<br>(0.130, 0.495)                     |
| Maine                                                                                                      | 0.279<br>(-0.268, 0.826)                      | 0.317*<br>(-0.058, 0.691)  | 0.043***<br>(0.018, 0.069)               | 0.040*<br>(-0.006, 0.085)  | 0.314***<br>(0.137, 0.491)        | 0.364***<br>(0.171, 0.556)                     |
| New York                                                                                                   | 0.033<br>(-0.352, 0.418)                      | 0.729***<br>(0.469, 0.990) | 0.049***<br>(0.021, 0.077)               | 0.049*<br>(-0.006, 0.104)  | 0.369***<br>(0.170, 0.569)        | 0.482***<br>(0.264, 0.700)                     |
| Oklahoma                                                                                                   | -1.131***<br>(-1.851, -0.411)                 | -0.302<br>(-0.787, 0.183)  | -0.008<br>(-0.035, 0.018)                | 0.003<br>(-0.053, 0.060)   | -0.021<br>(-0.184, 0.142)         | -0.026<br>(-0.207, 0.155)                      |
| South Carolina                                                                                             | -1.177*<br>(-2.524, 0.169)                    | 0.218<br>(-0.691, 1.126)   | 0.072***<br>(0.043, 0.100)               | 0.084***<br>(0.026, 0.143) | 0.505***<br>(0.315, 0.695)        | 0.592***<br>(0.387, 0.797)                     |
| Washington                                                                                                 | -0.004<br>(-0.426, 0.419)                     | 0.599***<br>(0.312, 0.885) | 0.035**<br>(0.009, 0.062)                | 0.035<br>(-0.028, 0.098)   | 0.247***<br>(0.072, 0.423)        | 0.393***<br>(0.186, 0.600)                     |
| West Virginia                                                                                              | -0.223<br>(-0.714, 0.268)                     | -0.243<br>(-0.569, 0.083)  | 0.045***<br>(0.017, 0.074)               | 0.046**<br>(0.011, 0.080)  | 0.294***<br>(0.112, 0.476)        | 0.242**<br>(0.057, 0.427)                      |
| Urban/rural classification of<br>county of residence (Fringe county<br>of large metropolitan area omitted) |                                               |                            |                                          |                            |                                   |                                                |
| Central city of large metro area                                                                           | 1.025<br>(-0.897, 2.948)                      | -1.274<br>(-3.262, 0.714)  | 0.045*<br>(-0.003, 0.093)                | 0.044<br>(-0.017, 0.105)   | 0.302*<br>(-0.014, 0.618)         | 0.173<br>(-0.159, 0.504)                       |
| Other metropolitan area                                                                                    | 0.887<br>(-1.072, 2.846)                      | -1.443<br>(-3.449, 0.564)  | 0.045*<br>(-0.006, 0.095)                | 0.046<br>(-0.033, 0.125)   | 0.293*<br>(-0.037, 0.622)         | 0.104<br>(-0.257, 0.465)                       |
| Nonmetropolitan area                                                                                       | 1.270<br>(-0.809, 3.348)                      | -1.830*<br>(-3.902, 0.243) | 0.060*<br>(-0.007, 0.127)                | 0.058<br>(-0.030, 0.147)   | 0.385*<br>(-0.058, 0.827)         | 0.200<br>(-0.263, 0.665)                       |
| County unemployment rate                                                                                   | 0.191<br>(-0.279, 0.661)                      | -0.190<br>(-0.687, 0.305)  | ---                                      | ---                        | ---                               | ---                                            |
| County unemployment rate ×<br>central city of large metro area                                             | -0.162<br>(-0.633, 0.309)                     | 0.205<br>(-0.291, 0.702)   | ---                                      | ---                        | ---                               | ---                                            |
| County unemployment rate ×<br>other metropolitan area                                                      | -0.173<br>(-0.645, 0.298)                     | 0.176<br>(-0.321, 0.673)   | ---                                      | ---                        | ---                               | ---                                            |
| County unemployment rate ×<br>nonmetropolitan area                                                         | -0.226<br>(-0.702, 0.250)                     | 0.232<br>(-0.267, 0.732)   | ---                                      | ---                        | ---                               | ---                                            |
| Month time trend                                                                                           | -0.008                                        | 0.001                      | -0.001                                   | -0.001                     | -0.005                            | -0.006*                                        |

|                                                                                           | Health Insurance Coverage<br>before Pregnancy |                               | First-trimester Prenatal Care Initiation |                               |                                   |                                                |
|-------------------------------------------------------------------------------------------|-----------------------------------------------|-------------------------------|------------------------------------------|-------------------------------|-----------------------------------|------------------------------------------------|
|                                                                                           | Medicaid                                      | Private<br>Insurance          | Ordinary Least<br>Squares                | Two-Stage<br>Least Squares    | Single Equation<br>Logistic Model | Two-Equation<br>Model with Terza<br>Adjustment |
| Mother was multiparous<br>(Mother was primiparous omitted)                                | (-0.020, 0.004)<br>1.210***                   | (-0.007, 0.009)<br>-0.025     | (-0.002, 0.000)<br>-0.029***             | (-0.002, 0.000)<br>-0.038*    | (-0.012, 0.001)<br>-0.245***      | (-0.013, 0.001)<br>-0.310***                   |
| Father's education<br>(Some college omitted)                                              | (1.011, 1.408)                                | (-0.147, 0.097)               | (-0.044, -0.013)                         | (-0.079, 0.003)               | (-0.362, -0.127)                  | (-0.447, -0.174)                               |
| Less than high school                                                                     | 0.040<br>(-0.280, 0.360)                      | -0.880***<br>(-1.092, -0.669) | -0.012<br>(-0.045, 0.021)                | -0.014<br>(-0.103, 0.075)     | -0.109<br>(-0.305, 0.086)         | -0.305**<br>(-0.549, -0.062)                   |
| High school graduate                                                                      | -0.107<br>(-0.400, 0.185)                     | -0.495***<br>(-0.646, -0.343) | 0.010<br>(-0.009, 0.028)                 | 0.012<br>(-0.027, 0.052)      | 0.019<br>(-0.131, 0.169)          | -0.065<br>(-0.230, 0.100)                      |
| Unknown                                                                                   | 0.336**<br>(0.016, 0.655)                     | -0.590***<br>(-0.789, -0.391) | -0.050***<br>(-0.080, -0.019)            | -0.055<br>(-0.125, 0.016)     | -0.247***<br>(-0.428, -0.065)     | -0.408***<br>(-0.618, -0.199)                  |
| State has cash diversion policy                                                           | 0.151<br>(-0.145, 0.446)                      | 0.076<br>(-0.126, 0.279)      | ---                                      | ---                           | ---                               | ---                                            |
| Ratio of minimum wage to the<br>maximum income level for<br>Medicaid eligibility in state | 0.005<br>(-0.528, 0.537)                      | -0.064<br>(-0.428, 0.299)     | ---                                      | ---                           | ---                               | ---                                            |
| Percent uninsured men in the state                                                        | 0.006<br>(-0.025, 0.036)                      | -0.027**<br>(-0.050, -0.005)  | ---                                      | ---                           | ---                               | ---                                            |
| Household growth in county of<br>residence                                                | -0.185***<br>(-0.278, -0.091)                 | -0.040<br>(-0.110, 0.029)     | ---                                      | ---                           | ---                               | ---                                            |
| Intendedness of pregnancy<br>(Wanted then omitted)                                        |                                               |                               |                                          |                               |                                   |                                                |
| Wanted sooner                                                                             | -0.180<br>(-0.458, 0.097)                     | 0.167**<br>(0.011, 0.323)     | 0.015*<br>(-0.002, 0.032)                | 0.015<br>(-0.006, 0.036)      | 0.152*<br>(-0.017, 0.321)         | 0.190**<br>(0.019, 0.361)                      |
| Wanted later                                                                              | -0.051<br>(-0.247, 0.146)                     | -0.225***<br>(-0.361, -0.089) | -0.076***<br>(-0.095, -0.057)            | -0.075***<br>(-0.101, -0.049) | -0.540***<br>(-0.668, -0.413)     | -0.579***<br>(-0.712, -0.445)                  |
| Did not want                                                                              | -0.053<br>(-0.306, 0.200)                     | -0.246**<br>(-0.445, -0.048)  | -0.166***<br>(-0.198, -0.134)            | -0.165***<br>(-0.204, -0.126) | -0.941***<br>(-1.107, -0.775)     | -0.989***<br>(-1.160, -0.818)                  |
| Don't know or missing                                                                     | -0.182<br>(-0.462, 0.099)                     | -0.331***<br>(-0.559, -0.103) | -0.101***<br>(-0.136, -0.066)            | -0.099***<br>(-0.142, -0.056) | -0.677***<br>(-0.872, -0.483)     | -0.726***<br>(-0.926, -0.525)                  |
| Mother smoked 3 months before<br>pregnancy (Nonsmoker omitted)                            |                                               |                               |                                          |                               |                                   |                                                |
| Smoked 1 to 20 cigarettes a                                                               | 0.018                                         | -0.266***                     | 0.008                                    | 0.008                         | 0.020                             | -0.032                                         |

|                                                                                                            | Health Insurance Coverage<br>before Pregnancy |                               | First-trimester Prenatal Care Initiation |                              |                                   |                                                |
|------------------------------------------------------------------------------------------------------------|-----------------------------------------------|-------------------------------|------------------------------------------|------------------------------|-----------------------------------|------------------------------------------------|
|                                                                                                            | Medicaid                                      | Private<br>Insurance          | Ordinary Least<br>Squares                | Two-Stage<br>Least Squares   | Single Equation<br>Logistic Model | Two-Equation<br>Model with Terza<br>Adjustment |
| day                                                                                                        | (-0.162, 0.197)                               | (-0.398, -0.133)              | (-0.010, 0.027)                          | (-0.019, 0.036)              | (-0.103, 0.143)                   | (-0.160, 0.097)                                |
| Smoked 21 or more cigarettes a<br>day                                                                      | 0.385**<br>(0.041, 0.729)                     | -0.617***<br>(-0.910, -0.324) | -0.005<br>(-0.053, 0.043)                | -0.017<br>(-0.095, 0.061)    | -0.058<br>(-0.315, 0.199)         | -0.211<br>(-0.484, 0.062)                      |
| Mother drank 3 months before<br>pregnancy (Nondrinker omitted)                                             |                                               |                               |                                          |                              |                                   |                                                |
| 1 to 3 drinks a week or<br>unknown amount                                                                  | -0.185**<br>(-0.359, -0.012)                  | 0.193***<br>(0.074, 0.312)    | 0.026***<br>(0.011, 0.042)               | 0.028**<br>(0.006, 0.050)    | 0.216***<br>(0.104, 0.327)        | 0.263***<br>(0.146, 0.379)                     |
| 4 or more drinks a week                                                                                    | -0.343**<br>(-0.662, -0.024)                  | 0.084<br>(-0.145, 0.312)      | -0.002<br>(-0.034, 0.029)                | 0.001<br>(-0.034, 0.035)     | -0.006<br>(-0.221, 0.208)         | 0.024<br>(-0.192, 0.239)                       |
| Number of major life stresses<br>faced by mother (None omitted)                                            |                                               |                               |                                          |                              |                                   |                                                |
| 1 to 2 stressors                                                                                           | 0.044<br>(-0.190, 0.278)                      | -0.170**<br>(-0.313, -0.027)  | -0.005<br>(-0.021, 0.012)                | -0.005<br>(-0.024, 0.013)    | -0.068<br>(-0.207, 0.071)         | -0.094<br>(-0.234, 0.046)                      |
| 3 to 5 stressors                                                                                           | -0.095<br>(-0.332, 0.143)                     | -0.448***<br>(-0.605, -0.291) | -0.030***<br>(-0.051, -0.009)            | -0.028<br>(-0.067, 0.012)    | -0.244***<br>(-0.392, -0.095)     | -0.318***<br>(-0.481, -0.155)                  |
| 6 to 13 stressors                                                                                          | 0.052<br>(-0.224, 0.328)                      | -0.697***<br>(-0.924, -0.470) | -0.034*<br>(-0.069, 0.001)               | -0.035<br>(-0.108, 0.039)    | -0.239**<br>(-0.432, -0.045)      | -0.388***<br>(-0.609, -0.166)                  |
| Mother has no major medical risk<br>factors (Mother has at least one<br>major medical risk factor omitted) | -0.228***<br>(-0.383, -0.074)                 | -0.053<br>(-0.163, 0.057)     | -0.021***<br>(-0.036, -0.007)            | -0.019**<br>(-0.037, -0.001) | -0.141***<br>(-0.244, -0.038)     | -0.136**<br>(-0.240, -0.033)                   |
| Number of obstetricians and<br>gynecologists per child-bearing<br>woman in the county of residence         | -0.014<br>(-0.034, 0.005)                     | 0.010<br>(-0.002, 0.023)      | 0.000<br>(-0.001, 0.002)                 | 0.000<br>(-0.001, 0.002)     | 0.005<br>(-0.007, 0.016)          | 0.007<br>(-0.004, 0.019)                       |
| Constant                                                                                                   | -2.746***<br>(-4.977, -0.514)                 | 3.018***<br>(0.855, 5.182)    | 0.689***<br>(0.619, 0.758)               | 0.659***<br>(0.265, 1.053)   | 0.974***<br>(0.520, 1.428)        | 1.788***<br>(0.935, 2.640)                     |
| Number of Observations                                                                                     | 38,940                                        |                               | 38,174                                   | 38,943                       | 38,174                            | 38,174                                         |

SOURCE: Regression run on data from the Pregnancy Risk Assessment Monitoring system (PRAMS) for Alaska, Florida, Maine, New York, Oklahoma, South Carolina, Washington, and West Virginia for 1996 through 1999.

Notes: \*\*\* p < 0.01, \*\* p < 0.05, \*p < 0.10.
