# Supplementary material
Source: PubMed Central journal article supplement (PMC1955278)
Supplement: hesr0042-1564-ts2.pdf [file hesr0042-1564-ts2.pdf]

**Appendix Table A2. Estimated Regression Coefficients (Upper, lower 95% confidence interval limits) in the Equations for Whether the Woman Began Prenatal Care in Her First Trimester**

|                                                                      | Florida                                     |                                                         | Oklahoma                                    |                                                         | Other Study States <sup>1</sup>             |                                                         |
|----------------------------------------------------------------------|---------------------------------------------|---------------------------------------------------------|---------------------------------------------|---------------------------------------------------------|---------------------------------------------|---------------------------------------------------------|
|                                                                      | Single Equation Logistic Model <sup>2</sup> | Two-Equation Model with Terza Adjustment <sup>2,3</sup> | Single Equation Logistic Model <sup>2</sup> | Two-Equation Model with Terza Adjustment <sup>2,3</sup> | Single Equation Logistic Model <sup>2</sup> | Two-Equation Model with Terza Adjustment <sup>2,3</sup> |
| Pregnancy insurance status (Uninsured omitted)                       |                                             |                                                         |                                             |                                                         |                                             |                                                         |
| Medicaid coverage                                                    | 0.551***<br>(0.273, 0.829)                  | 0.415<br>(-1.124, 1.955)                                | 0.225<br>(-0.197, 0.646)                    | 0.806<br>(-1.048, 2.660)                                | 0.610***<br>(0.395, 0.825)                  | 1.762***<br>(0.479, 3.046)                              |
|                                                                      | ---                                         | 0.127<br>(-1.432, 1.686)                                | ---                                         | -0.629<br>(-2.535, 1.278)                               | ---                                         | -1.200*<br>(-2.500, 0.100)                              |
| Private insurance coverage                                           | 1.003***<br>(0.776, 1.230)                  | -0.377<br>(-2.639, 1.886)                               | 0.699***<br>(0.441, 0.956)                  | -1.122<br>(-3.450, 1.205)                               | 0.579***<br>(0.419, 0.739)                  | -0.888<br>(-2.068, 0.291)                               |
|                                                                      | ---                                         | 1.384<br>(-0.882, 3.650)                                | ---                                         | 1.838<br>(-0.494, 4.170)                                | ---                                         | 1.460**<br>(0.277, 2.643)                               |
| Medicaid eligibility category (Expansion eligible omitted)           |                                             |                                                         |                                             |                                                         |                                             |                                                         |
| Welfare-related eligible                                             | 0.118<br>(-0.492, 0.729)                    | -0.009<br>(-0.677, 0.660)                               | -0.463<br>(-1.244, 0.318)                   | -0.566<br>(-1.522, 0.390)                               | 0.056<br>(-0.352, 0.463)                    | -0.426<br>(-0.951, 0.100)                               |
| Not eligible                                                         | 0.529**<br>(0.073, 0.985)                   | 0.824**<br>(0.187, 1.460)                               | 0.367<br>(-0.094, 0.827)                    | 0.984**<br>(0.118, 1.850)                               | 0.384***<br>(0.113, 0.655)                  | 0.958***<br>(0.531, 1.385)                              |
| Post-welfare reform (Pre-welfare reform omitted)                     | 0.465**<br>(0.033, 0.897)                   | 0.546**<br>(0.105, 0.987)                               | 0.228<br>(-0.276, 0.733)                    | 0.427<br>(-0.136, 0.991)                                | 0.196<br>(-0.119, 0.510)                    | 0.210<br>(-0.103, 0.523)                                |
| Interaction terms (Post-welfare reform × expansion eligible omitted) |                                             |                                                         |                                             |                                                         |                                             |                                                         |
| Post-welfare reform × Welfare-related eligible                       | -0.536<br>(-1.268, 0.196)                   | -0.397<br>(-1.157, 0.362)                               | 0.996**<br>(0.122, 1.870)                   | 0.837*<br>(-0.118, 1.793)                               | 0.103<br>(-0.344, 0.549)                    | 0.283<br>(-0.201, 0.767)                                |
| Post-welfare reform × Not eligible                                   | -0.434*<br>(-0.943, 0.075)                  | -0.471*<br>(-0.982, 0.040)                              | -0.266<br>(0.765, 0.233)                    | -0.416<br>(-0.944, 0.112)                               | -0.055<br>(-0.346, 0.235)                   | -0.101<br>(-0.393, 0.191)                               |
| Mother's age                                                         |                                             |                                                         |                                             |                                                         |                                             |                                                         |

|                                                    | Florida                                     |                                                         | Oklahoma                                    |                                                         | Other Study States <sup>1</sup>             |                                                         |
|----------------------------------------------------|---------------------------------------------|---------------------------------------------------------|---------------------------------------------|---------------------------------------------------------|---------------------------------------------|---------------------------------------------------------|
|                                                    | Single Equation Logistic Model <sup>2</sup> | Two-Equation Model with Terza Adjustment <sup>2,3</sup> | Single Equation Logistic Model <sup>2</sup> | Two-Equation Model with Terza Adjustment <sup>2,3</sup> | Single Equation Logistic Model <sup>2</sup> | Two-Equation Model with Terza Adjustment <sup>2,3</sup> |
| (25 to 34 years omitted)                           |                                             |                                                         |                                             |                                                         |                                             |                                                         |
| Under 17 years                                     | -0.854***<br>(-1.308, -0.399)               | -0.660**<br>(-1.314, -0.006)                            | -0.412<br>(-1.181, 0.358)                   | -0.489<br>(-1.259, 0.281)                               | -0.712***<br>(-1.112, -0.312)               | -0.777***<br>(-1.259, -0.295)                           |
| 17 to 24 years                                     | -0.307**<br>(-0.560, -0.054)                | -0.374***<br>(-0.643, -0.104)                           | 0.078<br>(-0.177, 0.333)                    | -0.051<br>(-0.353, 0.252)                               | -0.132<br>(-0.290, 0.026)                   | -0.287***<br>(-0.468, -0.106)                           |
| 35 or more years                                   | -0.320*<br>(-0.653, 0.012)                  | -0.277<br>(-0.614, 0.060)                               | 0.189<br>(-0.225, 0.603)                    | 0.232<br>(-0.188, 0.653)                                | -0.032<br>(-0.241, 0.178)                   | 0.029<br>(-0.186, 0.243)                                |
| Mother's race<br>(Non-Hispanic white omitted)      |                                             |                                                         |                                             |                                                         |                                             |                                                         |
| Non-Hispanic black                                 | -0.406***<br>(-0.646, -0.165)               | -0.341**<br>(-0.670, -0.011)                            | 0.075<br>(-0.313, 0.464)                    | -0.030<br>(-0.462, 0.402)                               | -0.342***<br>(-0.561, -0.122)               | -0.390***<br>(-0.614, 0.165)                            |
| Hispanic                                           | -0.239*<br>(-0.500, 0.023)                  | -0.389**<br>(-0.745, -0.033)                            | 0.081<br>(-0.384, 0.546)                    | -0.100<br>(-0.644, 0.444)                               | -0.290**<br>(-0.534, -0.045)                | -0.624***<br>(-0.975, 0.274)                            |
| Asian or Pacific Islander                          | -1.124***<br>(-1.856, -0.392)               | -1.156***<br>(-1.890, -0.422)                           | -1.051***<br>(-1.710, -0.393)               | -1.139***<br>(-1.818, -0.461)                           | -0.731***<br>(-0.972, -0.492)               | -0.819***<br>(-1.070, -0.569)                           |
| Native American or Alaska native                   | -0.613<br>(-1.659, 0.433)                   | -0.523<br>(-1.571, 0.526)                               | 0.134<br>(-0.229, 0.497)                    | -0.132<br>(-0.647, 0.383)                               | -0.227<br>(-0.538, 0.084)                   | -0.357**<br>(-0.674, -0.040)                            |
| Other or unknown                                   | -0.338<br>(-2.168, 1.491)                   | -0.296<br>(-2.199, 1.606)                               | -0.315<br>(-1.304, 0.675)                   | -0.260<br>(-1.245, 0.725)                               | -0.385<br>(-0.990, 0.220)                   | -0.336<br>(-0.948, 0.276)                               |
| Mother's education<br>(Some college omitted)       |                                             |                                                         |                                             |                                                         |                                             |                                                         |
| Less than high school                              | -0.570***<br>(-0.888, -0.251)               | -0.813***<br>(-1.281, -0.345)                           | -0.591***<br>(-0.937, -0.245)               | -0.941***<br>(-1.437, -0.445)                           | -0.506***<br>(-0.723, -0.289)               | -0.826***<br>(-1.097, -0.555)                           |
| High school graduate only                          | -0.173<br>(-0.443, 0.097)                   | -0.281*<br>(-0.589, 0.028)                              | -0.270**<br>(-0.534, -0.005)                | -0.460***<br>(-0.785, -0.135)                           | -0.268***<br>(-0.437, -0.099)               | -0.383***<br>(-0.561, -0.205)                           |
| Unknown                                            | 0.071<br>(-0.846, 0.989)                    | 0.266<br>(-0.680, 1.212)                                | -0.249<br>(-0.919, 0.420)                   | -0.388<br>(-1.065, 0.289)                               | -0.274<br>(-0.610, 0.062)                   | -0.351**<br>(-0.688, -0.015)                            |
| Mother was married<br>(Mother not married omitted) | 0.034<br>(-0.226, 0.294)                    | 0.227<br>(-0.157, 0.612)                                | 0.390**<br>(0.075, 0.705)                   | 0.495***<br>(0.155, 0.834)                              | 0.400***<br>(0.213, 0.588)                  | 0.530***<br>(0.318, 0.741)                              |
| State (Alaska omitted)                             |                                             |                                                         |                                             |                                                         |                                             |                                                         |
| Maine                                              | ---                                         | ---                                                     | ---                                         | ---                                                     | 0.286***<br>(0.093, 0.478)                  | 0.331***<br>(0.119, 0.543)                              |
| New York                                           | ---                                         | ---                                                     | ---                                         | ---                                                     | 0.303***                                    | 0.473***                                                |

|                                                                                                      | Florida                                     |                                                         | Oklahoma                                    |                                                         | Other Study States <sup>1</sup>             |                                                         |
|------------------------------------------------------------------------------------------------------|---------------------------------------------|---------------------------------------------------------|---------------------------------------------|---------------------------------------------------------|---------------------------------------------|---------------------------------------------------------|
|                                                                                                      | Single Equation Logistic Model <sup>2</sup> | Two-Equation Model with Terza Adjustment <sup>2,3</sup> | Single Equation Logistic Model <sup>2</sup> | Two-Equation Model with Terza Adjustment <sup>2,3</sup> | Single Equation Logistic Model <sup>2</sup> | Two-Equation Model with Terza Adjustment <sup>2,3</sup> |
| South Carolina                                                                                       | ---                                         | ---                                                     | ---                                         | ---                                                     | (0.086, 0.519)<br>0.418***                  | (0.224, 0.723)<br>0.596***                              |
| Washington                                                                                           | ---                                         | ---                                                     | ---                                         | ---                                                     | (0.203, 0.634)<br>0.195**                   | (0.364, 0.828)<br>0.458***                              |
| West Virginia                                                                                        | ---                                         | ---                                                     | ---                                         | ---                                                     | (0.005, 0.386)<br>0.193*                    | (0.204, 0.712)<br>0.112                                 |
| Urban/rural classification of county of residence (Fringe county of large metropolitan area omitted) |                                             |                                                         |                                             |                                                         | (-0.004, 0.389)                             | (-0.087, 0.312)                                         |
| Central city of large metro area                                                                     | -0.010<br>(-0.682, 0.662)                   | -0.156<br>(-0.877, 0.565)                               | ---                                         | ---                                                     | 0.512***<br>(0.184, 0.841)                  | 0.356**<br>(0.012, 0.701)                               |
| Other metropolitan area                                                                              | 0.506<br>(-0.268, 1.279)                    | 0.202<br>(-0.740, 1.145)                                | -0.040<br>(-0.293, 0.213)                   | -0.115<br>(-0.382, 0.152)                               | 0.366**<br>(-0.020, 0.711)                  | 0.178<br>(-0.190, 0.545)                                |
| Nonmetropolitan area                                                                                 | -0.046<br>(-1.458, 1.366)                   | -0.372<br>(-1.903, 1.158)                               | 0.063<br>(-0.933, 1.058)                    | -0.131<br>(-1.154, 0.893)                               | 0.598***<br>(0.202, 0.994)                  | 0.577**<br>(0.067, 0.886)                               |
| Month time trend                                                                                     | -0.007<br>(-0.019, 0.006)                   | -0.008<br>(-0.020, 0.005)                               | -0.005<br>(-0.019, 0.008)                   | -0.006<br>(-0.020, 0.008)                               | -0.005<br>(-0.014, 0.004)                   | -0.005<br>(-0.014, 0.005)                               |
| Mother was multiparous (Mother was primiparous omitted)                                              | -0.172<br>(-0.395, 0.050)                   | -0.215<br>(-0.483, 0.053)                               | -0.141<br>(-0.385, 0.103)                   | -0.253*<br>(-0.522, 0.016)                              | -0.321***<br>(-0.472, -0.169)               | -0.440***<br>(-0.611, -0.269)                           |
| Father's education (Some college omitted)                                                            |                                             |                                                         |                                             |                                                         |                                             |                                                         |
| Less than high school                                                                                | -0.071<br>(-0.437, 0.296)                   | -0.347<br>(-0.930, 0.235)                               | -0.274<br>(-0.678, 0.131)                   | -0.615**<br>(-1.187, -0.043)                            | -0.117<br>(-0.369, 0.135)                   | -0.312**<br>(-0.583, 0.042)                             |
| High school graduate                                                                                 | 0.017<br>(-0.284, 0.318)                    | -0.138<br>(-0.536, 0.259)                               | -0.089<br>(-0.372, 0.194)                   | -0.269<br>(-0.626, 0.088)                               | 0.052<br>(-0.134, 0.238)                    | 0.011<br>(-0.177, 0.198)                                |
| Unknown                                                                                              | -0.503***<br>(-0.846, -0.160)               | -0.731***<br>(-1.207, -0.256)                           | -0.089<br>(-0.486, 0.308)                   | -0.335<br>(-0.826, -0.157)                              | -0.067<br>(-0.302, 0.169)                   | -0.249*<br>(-0.499, 0.001)                              |
| Intendedness of pregnancy (Wanted then omitted)                                                      |                                             |                                                         |                                             |                                                         |                                             |                                                         |
| Wanted sooner                                                                                        | 0.141<br>(-0.219, 0.501)                    | 0.205<br>(-0.160, 0.570)                                | 0.241<br>(-0.106, 0.589)                    | 0.302*<br>(-0.052, 0.657)                               | 0.129<br>(-0.070, 0.327)                    | 0.157<br>(-0.043, 0.358)                                |
| Wanted later                                                                                         | -0.608***                                   | -0.661***                                               | -0.448***                                   | -0.539***                                               | -0.517***                                   | -0.543***                                               |

|                                                                                                      | Florida                                     |                                                         | Oklahoma                                    |                                                         | Other Study States <sup>1</sup>             |                                                         |
|------------------------------------------------------------------------------------------------------|---------------------------------------------|---------------------------------------------------------|---------------------------------------------|---------------------------------------------------------|---------------------------------------------|---------------------------------------------------------|
|                                                                                                      | Single Equation Logistic Model <sup>2</sup> | Two-Equation Model with Terza Adjustment <sup>2,3</sup> | Single Equation Logistic Model <sup>2</sup> | Two-Equation Model with Terza Adjustment <sup>2,3</sup> | Single Equation Logistic Model <sup>2</sup> | Two-Equation Model with Terza Adjustment <sup>2,3</sup> |
| Did not want                                                                                         | (-0.869, -0.347)<br>-0.991***               | (-0.945, -0.376)<br>-1.086***                           | (-0.709, -0.188)<br>-0.799***               | (-0.809, -0.269)<br>-0.902***                           | (-0.671, 0.363)<br>-0.919***                | (-0.701, -0.385)<br>-0.899***                           |
| Don't know or missing                                                                                | (-1.292, -0.690)<br>-0.644***               | (-1.428, -0.744)<br>-0.752***                           | (-1.155, -0.443)<br>0.080                   | (-1.273, 0.532)<br>-0.064                               | (-1.141, -0.697)<br>-0.875***               | (-1.121, -0.677)<br>-0.907***                           |
| Mother smoked 3 months before pregnancy (Nonsmoker omitted)                                          |                                             |                                                         |                                             |                                                         |                                             |                                                         |
| Smoked 1 to 20 cigarettes a day                                                                      | -0.276**<br>(-0.531, -0.021)                | -0.323**<br>(-0.593, -0.053)                            | 0.083<br>(-0.161, 0.328)                    | 0.017<br>(-0.247, 0.282)                                | 0.160**<br>(0.006, 0.314)                   | 0.063<br>(-0.097, 0.223)                                |
| Smoked 21 or more cigarettes a day                                                                   | -0.225<br>(-0.729, 0.280)                   | -0.307<br>(-0.821, 0.206)                               | 0.144<br>(-0.361, 0.649)                    | -0.067<br>(-0.661, 0.527)                               | -0.025<br>(-0.351, 0.301)                   | -0.309*<br>(-0.658, 0.040)                              |
| Mother drank 3 months before pregnancy (Nondrinker omitted)                                          |                                             |                                                         |                                             |                                                         |                                             |                                                         |
| 1 to 3 drinks a week or unknown amount                                                               | 0.283**<br>(0.059, 0.508)                   | 0.342***<br>(0.099, 0.586)                              | 0.093<br>(-0.136, 0.321)                    | 0.142<br>(-0.092, 0.377)                                | 0.187***<br>(0.046, 0.328)                  | 0.250***<br>(0.105, 0.394)                              |
| 4 or more drinks a week                                                                              | 0.089<br>(-0.395, 0.572)                    | 0.116<br>(-0.372, 0.603)                                | 0.033<br>(-0.375, 0.441)                    | 0.127<br>(-0.295, 0.548)                                | -0.101<br>(-0.352, 0.150)                   | -0.044<br>(-0.294, 0.205)                               |
| Number of major life stresses faced by mother (None omitted)                                         |                                             |                                                         |                                             |                                                         |                                             |                                                         |
| 1 to 2 stressors                                                                                     | -0.057<br>(-0.337, 0.223)                   | -0.121<br>(-0.417, 0.175)                               | -0.135<br>(-0.447, 0.176)                   | -0.167<br>(-0.482, 0.149)                               | -0.073<br>(-0.241, 0.094)                   | -0.065<br>(-0.233, 0.102)                               |
| 3 to 5 stressors                                                                                     | -0.331**<br>(-0.621, -0.042)                | -0.460**<br>(-0.819, -0.101)                            | -0.496***<br>(-0.819, -0.172)               | -0.612***<br>(-0.971, -0.252)                           | -0.121<br>(-0.308, 0.066)                   | -0.162*<br>(-0.354, 0.031)                              |
| 6 to 13 stressors                                                                                    | -0.132<br>(-0.498, 0.233)                   | -0.337<br>(-0.812, 0.138)                               | -0.537**<br>(-0.947, -0.126)                | -0.813***<br>(-1.332, -0.294)                           | -0.251*<br>(-0.503, 0.001)                  | -0.404***<br>(-0.671, -0.137)                           |
| Mother has no major medical risk factors (Mother has at least one major medical risk factor omitted) | -0.149<br>(-0.363, 0.064)                   | -0.156<br>(-0.373, 0.060)                               | 0.015<br>(-0.194, 0.224)                    | -0.093<br>(-0.350, 0.163)                               | -0.173**<br>(-0.304, -0.041)                | -0.132**<br>(-0.263, -0.001)                            |
| Number of obstetricians and gynecologists per child-bearing woman in the county of residence         | -0.014<br>(-0.048, 0.021)                   | -0.006<br>(-0.042, 0.029)                               | -0.002<br>(-0.031, 0.027)                   | 0.001<br>(-0.029, 0.031)                                | 0.007<br>(-0.006, 0.020)                    | 0.010<br>(-0.003, 0.024)                                |
| Constant                                                                                             | 1.820***<br>(0.940, 2.701)                  | 2.829***<br>(0.911, 4.747)                              | 1.023***<br>(0.371, 1.675)                  | 2.145***<br>(0.564, 3.727)                              | 0.788***<br>(0.257, 1.320)                  | 1.589***<br>(0.694, 2.484)                              |

|                        | Florida                                     |                                                         | Oklahoma                                    |                                                         | Other Study States <sup>1</sup>             |                                                         |
|------------------------|---------------------------------------------|---------------------------------------------------------|---------------------------------------------|---------------------------------------------------------|---------------------------------------------|---------------------------------------------------------|
|                        | Single Equation Logistic Model <sup>2</sup> | Two-Equation Model with Terza Adjustment <sup>2,3</sup> | Single Equation Logistic Model <sup>2</sup> | Two-Equation Model with Terza Adjustment <sup>2,3</sup> | Single Equation Logistic Model <sup>2</sup> | Two-Equation Model with Terza Adjustment <sup>2,3</sup> |
| Number of Observations | 6,393                                       | 6,393                                                   | 6,165                                       | 6,165                                                   | 25,616                                      | 25,616                                                  |

SOURCE: Regression run on data from the Pregnancy Risk Assessment Monitoring system (PRAMS) for 1996 through 1999.

\*\*\* p < 0.01, \*\* p < 0.05, \*p < 0.10.

<sup>1</sup> Alaska, Maine, New York (excluding New York City), South Carolina, Washington, and West Virginia.

<sup>2</sup> Other independent variables in the equation include mother's age, race, and educational and marital status; whether she resided in a central city or fringe county of a large metropolitan area, another metropolitan area, or a nonmetropolitan area; whether the pregnancy was her first and whether it was intended; whether she drank, smoked, or was experiencing certain life stressors during pregnancy; whether she had any medical conditions putting the pregnancy at risk; the father's education status; the ratio of obstetricians to births in the county of residence; indicators for the state of residence; and a monthly time trend variable.

<sup>3</sup> The first stage equation for both equations was a multinomial logistic for whether the mother had Medicaid or private insurance coverage prior to becoming pregnant or whether she was uninsured. Besides the independent variables listed above, we also included the following variables as instrumental variables in this equation: the ratio of minimum wage to the maximum income to qualify for Medicaid; the percentage of single men in the state who were uninsured; whether the state had a cash diversion policy in its welfare program; and the annual percentage growth in households in the woman's county of residence, the county unemployment rate, and the interaction of the unemployment rate with the metropolitan designation of the county.
